# Supplementary material for: Human Gingival Integration-Free iPSCs; a Source for MSC-Like Cell
Source: Int J Mol Sci. 2015 Jun 15;16(6):13633–48. doi: 10.3390/ijms160613633 (PMC4490513; doi:10.3390/ijms160613633)
Supplement: Supplementary file 1 [file ijms-16-13633-s001.pdf]

## Supplementary Information

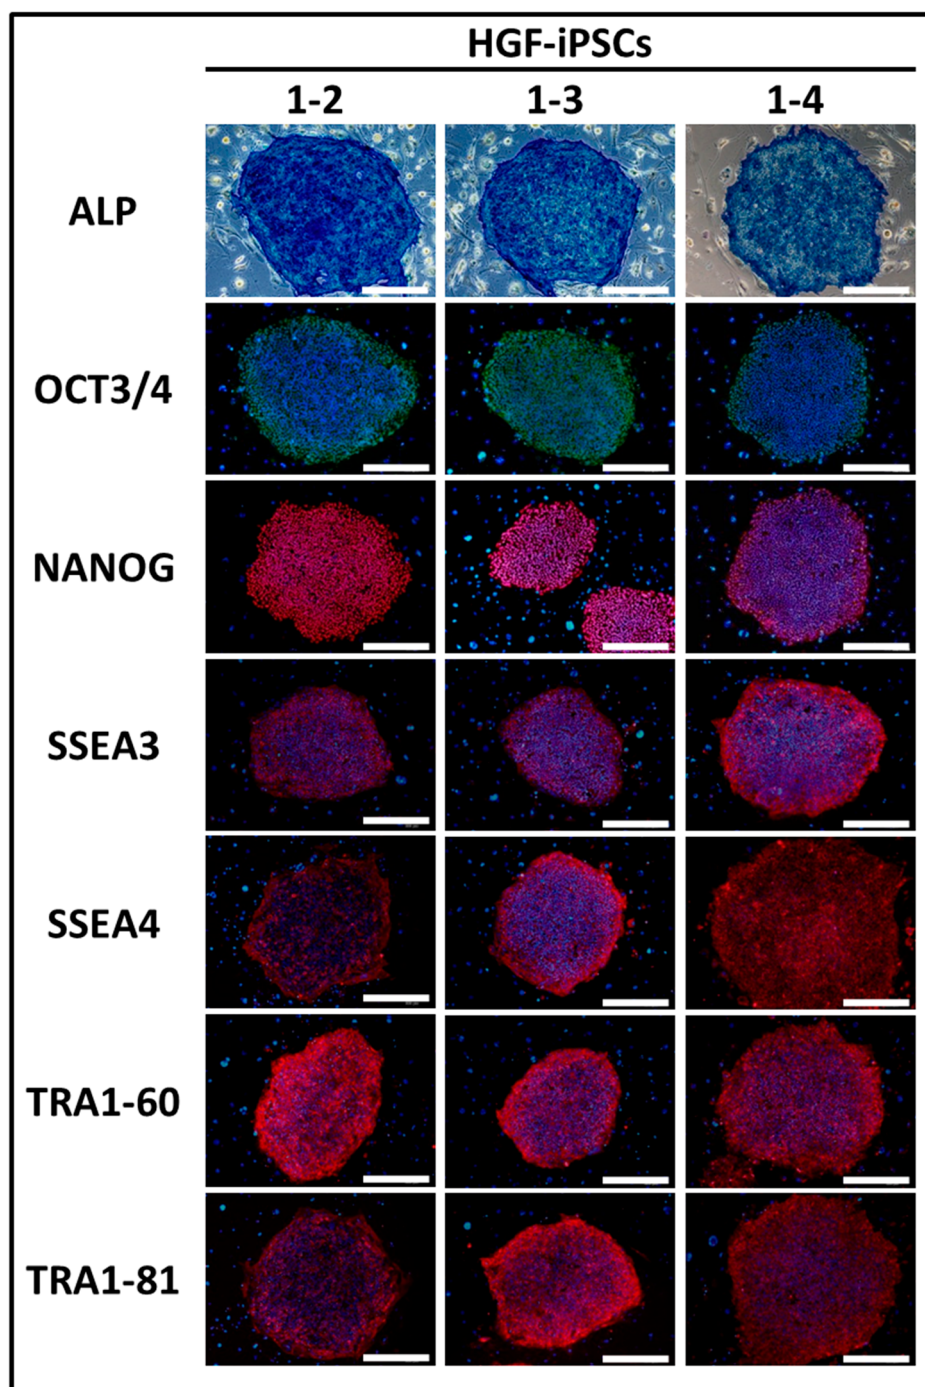

**Figure S1.** Characterization of the established iPSC 1-2, 1-3, and 1-4 lines from HGFs. HGF-iPSCs 1-2 (passage 23), 1-3 (passage 21), and 1-4 (passage 23), cultured on SNL feeder, were stained to identify any ALP activities and for OCT3/4, NANOG, SSEA-3, SSEA-4, TRA-1-60, and TRA-1-81. Scale bar = 400  $\mu$ m.

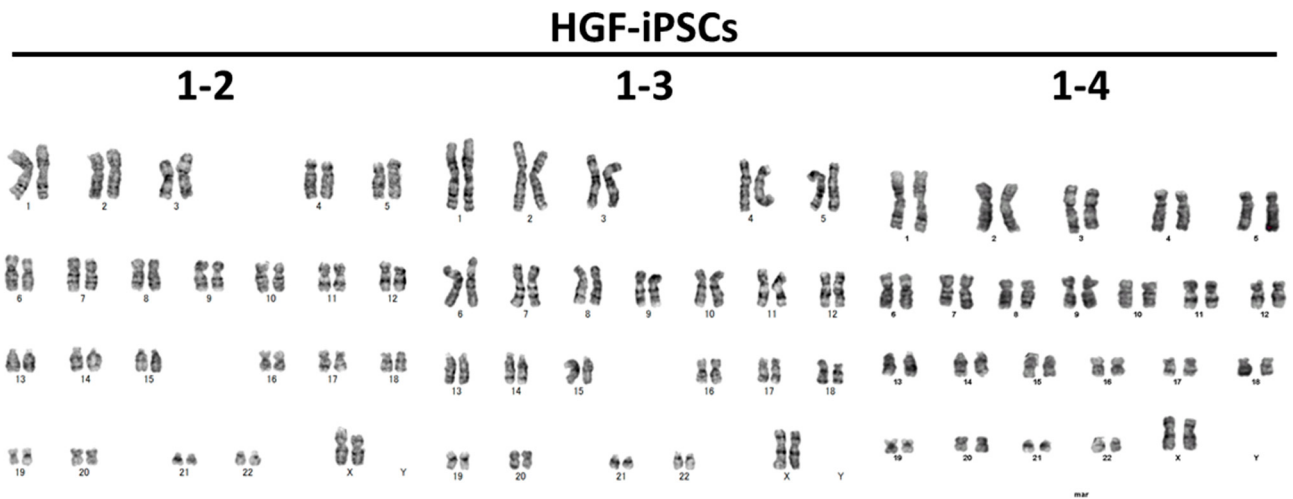

**Figure S2.** Karyotype analysis of the established iPSC 1-2, 1-3, and 1-4 lines from HGFs. HGF-iPSCs 1-2 (passage 23), 1-3 (passage 21), and 1-4 (passage 23), cultured on SNL feeder, were analyzed by G-band staining. A karyotype analysis showed a normal human karyotype for the tested three clones.

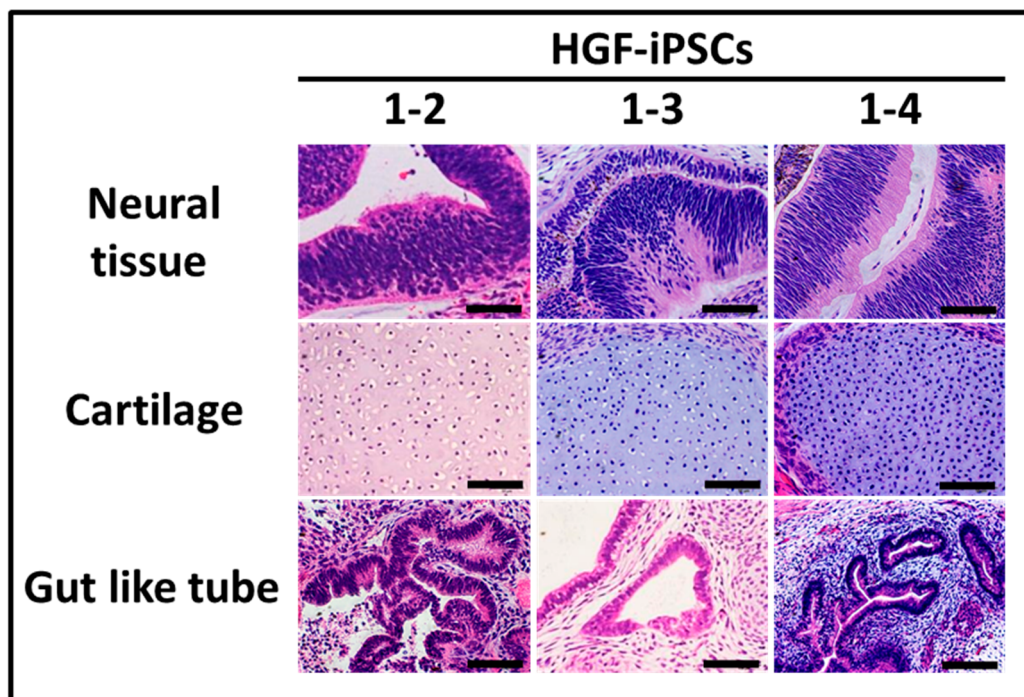

**Figure S3.** iPSCs have the potential to differentiate into three germ layers *in vivo*. Hematoxylin and eosin staining of teratoma derived from HGF-iPSCs 1-2 (passage 23), 1-3 (passage 21), and 1-4 (passage 23); and observation of neural tissue (ectoderm), cartilage (mesoderm), and gut-like tube (endoderm). Scale bar = 200  $\mu$ m.

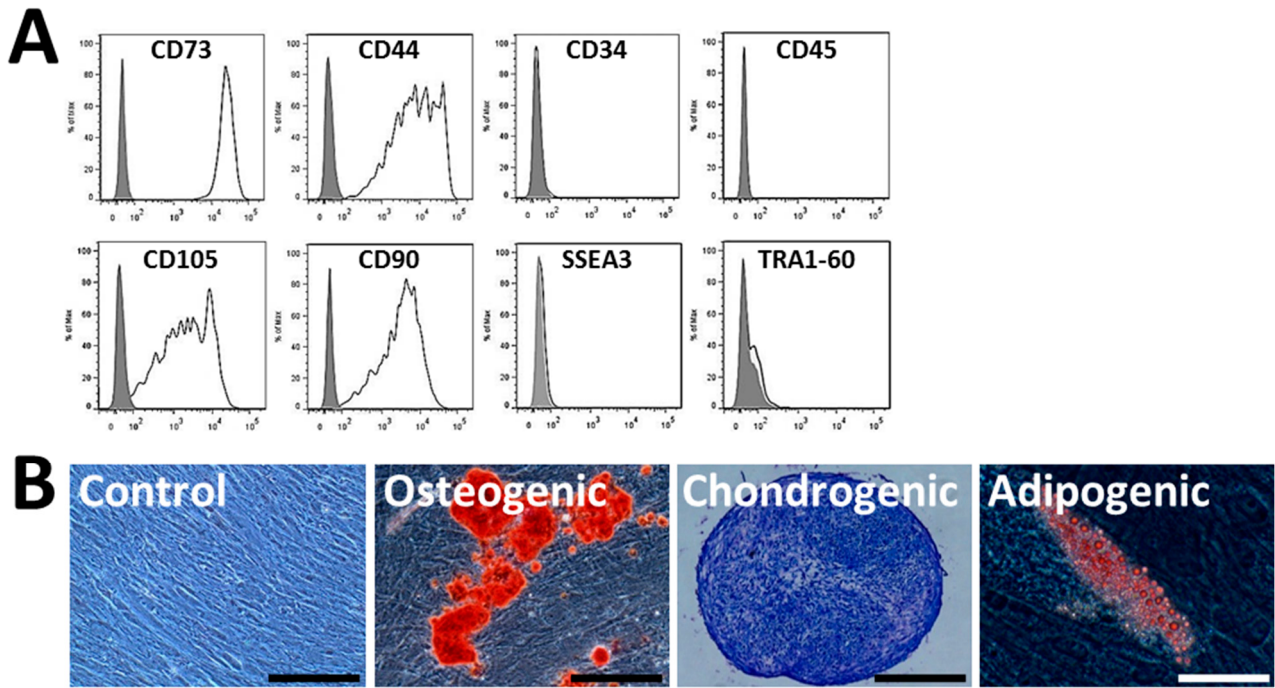

**Figure S4.** Characterization of MSC-like cells derived from HGF-iPSCs 1-2. **(A)** MSLCs 1-2 were differentiated at passage 23. Flow cytometry analysis of MSC-related surface markers (CD44, CD73, CD90, and CD105), hematopoietic markers (CD34 and CD45), and pluripotent markers (SSEA-3 and TRA-1-60) in MSLCs 1-2 at passage 10; **(B)** MSLCs 1-2 at passage 10 were tested for their capacity of trilineage differentiation. MSLCs in control conditions were assessed for 21 days. Calcium deposition in osteogenic-differentiated MSLCs 1-2 was detected by Alizarin Red, in contrast control condition. Small lipid droplets in the cytoplasm of adipogenic-differentiated MSLCs 1-2 were observed by Oil Red O staining. Proteoglycan-rich extracellular matrices of chondrogenic-differentiated MSLCs 1-2 were stained red-purple by toluidine blue. Black Scale bar = 400  $\mu\text{m}$ , White Scale bar = 200  $\mu\text{m}$ .

**Table S1.** List of primers used for quantitative RT-PCR of iPSCs [7,15].

| Primer                      | Gene   | Sequences (5' to 3') |                            |
|-----------------------------|--------|----------------------|----------------------------|
| pluripotent marker          | OCT3/4 | Forward              | GAAACCCACACTGCAGCAGA       |
|                             |        | Reverse              | TCGCTTGCCCTTCTGGCG         |
|                             | NANOG  | Forward              | CTCAGCTACAAACAGGTGAAGAC    |
|                             |        | Reverse              | TCCCTGGTGGTAGGAAGAGTAAA    |
|                             | SOX2   | Forward              | GGGAAATGGGAGGGGTGCAAAAGAGG |
|                             |        | Reverse              | TTGCGTGAGTGTGGATGGGATTGGTG |
|                             | KLF4   | Forward              | CGCTCCATTACCAAGAGCTCAT     |
|                             |        | Reverse              | CGATCGTCTTCCCCCTCTTTG      |
| integration analysis marker | REX1   | Forward              | TGCAGGCGGAAATAGAACCT       |
|                             |        | Reverse              | TCATAGCACACATAGCCATCACAT   |
|                             | TERT   | Forward              | CGTACAGGTTTCACGCATGTG      |
|                             |        | Reverse              | ATGACGCGCAGGAAAAATGT       |
|                             | C-MYC  | Forward              | GTTGGTCAGGCTGGTCTTGAA      |
|                             |        | Reverse              | CATGCGCCTGTAATCCTAGCA      |
|                             | DPPA5  | Forward              | CAGACGCGGCTGCTGAA          |
|                             |        | Reverse              | TGCTCGATGTAAGGGATTCTGA     |
| internal control            | pEP4-S | Forward              | TTCCACGAGGGTAGTGAACC       |
|                             |        | Reverse              | TCGGGGGTGTTAGAGACAAC       |
|                             | GAPDH  | Forward              | CCACTCCTCCACCTTTGACG       |
|                             |        | Reverse              | ATGAGGTCCACCACCCTGTT       |

**Table S2.** Antibodies used for immunochemical staining for HGF-iPSCs and flow cytometry for MSC-like cells derived from HGF-iPSCs [7,26].

| Antibodies             | Supplier       | Cat. No.   | Dilution     |
|------------------------|----------------|------------|--------------|
| OCT3/4                 | Santacruz      | SC5279     | 1/200        |
| NANOG                  | Cell Signaling | 3580       | 1/800        |
| SSEA3                  | abcam          | ab16286    | 1/200        |
| SSEA4                  | Millipore      | MAB4360    | 1/200        |
| TRA1-60                | Millipore      | MAB4304    | 1/200        |
| TRA1-81                | Millipore      | MAB4381    | 1/200        |
| $\beta$ -III TUBULIN   | SIGMA          | T4026      | 1/200        |
| $\alpha$ -SMA          | SIGMA          | A2547      | 1/100        |
| AFP                    | Millipore      | MAB5386    | 1/100        |
| DAPI                   | invitrogen     | D1306      | 5 $\mu$ g/mL |
| Alexa Fluor 488 mouse  | invitrogen     | A11059     | 1/500        |
| Alexa Fluor 594 mouse  | invitrogen     | A11062     | 1/500        |
| Alexa Fluor 488 rat    | invitrogen     | A11006     | 1/500        |
| Alexa Fluor 594 rat    | invitrogen     | A21211     | 1/500        |
| Alexa Fluor 488 rabbit | invitrogen     | A11008     | 1/500        |
| Alexa Fluor 594 rabbit | invitrogen     | A11012     | 1/500        |
| CD34                   | Biologend      | 343606     | 1/100        |
| CD44                   | BD             | 560890     | 1/125        |
| CD45                   | Biologend      | 304012     | 1/100        |
| CD73                   | eBioscience    | 17-0739-42 | 1/65         |
| CD90                   | BD             | 559869     | 1/50         |
| CD105                  | eBioscience    | 12-1057-42 | 1/100        |
| IgG1k(PE)              | BD             | 555749     | 1/100        |
| IgG1k(APC)             | BD             | 550854     | 1/100        |
